# Supplementary material for: The impact of introduction of the 10-valent pneumococcal conjugate vaccine on pneumococcal carriage in Nigeria
Source: PubMed Central journal article supplement (PMC10169786; doi:10.1038/s41467-023-38277-z), 2023-05-09
Supplement: 41467_2023_38277_MOESM1_ESM.pdf [file 41467_2023_38277_MOESM1_ESM.pdf]

## Supplement

# The impact of introduction of the 10-valent pneumococcal conjugate vaccine on pneumococcal carriage in Nigeria

## Authors

Aishatu L Adamu<sup>1,2,3\*</sup>, J. Ojal<sup>1,2</sup>, Isa A. Abubakar<sup>3</sup>, Kofo Odeyemi<sup>4</sup>, Musa M. Bello<sup>3</sup>, Christy A.N. Okoromah<sup>5</sup>, Boniface Karia<sup>1</sup>, Angela Karani<sup>1</sup>, Donald. Akech<sup>1</sup>, Victor Inem<sup>4</sup>, J. Anthony G Scott<sup>1,2</sup>, Ifedayo M.O. Adetifa<sup>1,2,5,6</sup>

<sup>1</sup>KEMRI-Wellcome Trust Research Programme, Kilifi, Kenya

<sup>2</sup>Department of Infectious Diseases Epidemiology, London School of Hygiene & Tropical Medicine, UK

<sup>3</sup>Department of Community Medicine, College of Health Sciences, Bayero University, Kano/Aminu Kano Teaching Hospital, Kano, Nigeria

<sup>4</sup>Department of Community Medicine and Primary Care, College of Medicine, University of Lagos, Lagos, Nigeria

<sup>5</sup>Department of Paediatrics and Child Health, College of Medicine, University of Lagos, Lagos, Nigeria.

<sup>6</sup>Nigeria Centre for Disease Control, Abuja, Nigeria

\*Corresponding author

These authors jointly supervised this work: JAGS and IMOA

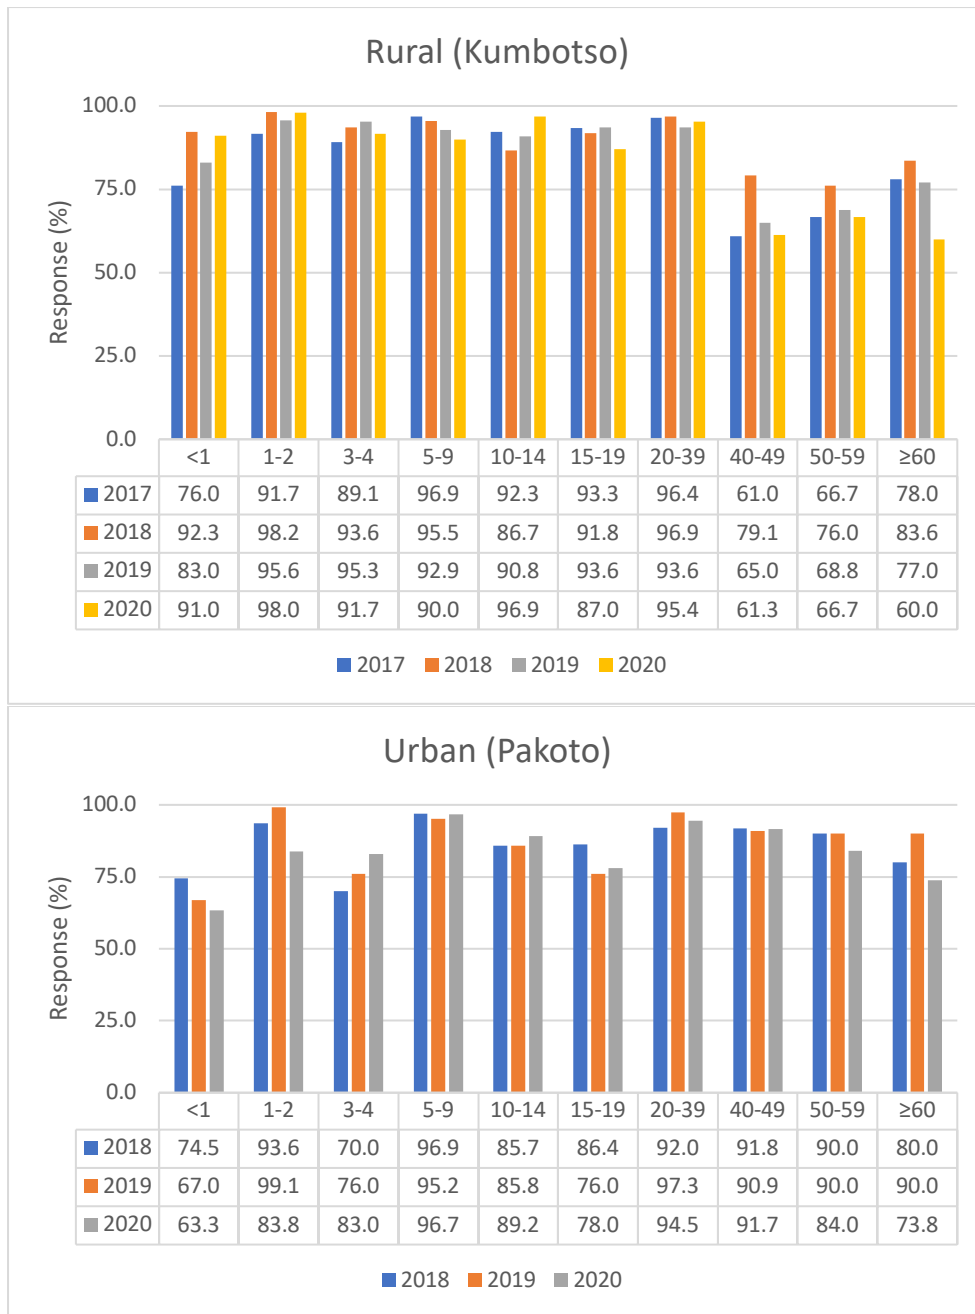

Supplementary Fig. 1: **Annual participation in carriage surveys.** Proportion of invited participants in sampled age groups that consented to be swabbed by survey year in the rural and urban sites.

Supplement Table 1: Numbers of participants invited\*, consented, and swabbed in each carriage survey in the rural site

| Age group               | swabbed    | invited      | consented  | swabbed    | invited      | consented   | swabbed    | invited      | consented    | swabbed    | invited      | consented  | swabbed    |
|-------------------------|------------|--------------|------------|------------|--------------|-------------|------------|--------------|--------------|------------|--------------|------------|------------|
|                         | 2016**     | 2017         |            |            | 2018         |             |            | 2019         |              |            | 2020         |            |            |
| <b>Kumbotso (rural)</b> |            |              |            |            |              |             |            |              |              |            |              |            |            |
| <1                      | 73         | 100          | 76         | 71         | 130          | 120         | 108        | 100          | 83           | 82         | 100          | 91         | 89         |
| 1-2                     | 132        | 120          | 110        | 105        | 110          | 108         | 101        | 160          | 153          | 147        | 150          | 147        | 141        |
| 3-4                     | 91         | 110          | 98         | 88         | 110          | 103         | 95         | 150          | 143          | 133        | 120          | 110        | 106        |
| 5-9                     | 191        | 130          | 126        | 116        | 110          | 105         | 102        | 140          | 130          | 124        | 140          | 126        | 120        |
| 10-14                   | 81         | 130          | 120        | 110        | 150          | 130         | 119        | 120          | 109          | 106        | 160          | 155        | 149        |
| 15-19                   | 38         | 120          | 112        | 107        | 110          | 101         | 97         | 110          | 103          | 96         | 100          | 87         | 85         |
| 20-39                   | 154        | 110          | 106        | 104        | 130          | 126         | 125        | 110          | 103          | 101        | 130          | 124        | 122        |
| 40-49                   | 46         | 100          | 61         | 61         | 110          | 87          | 87         | 80           | 52           | 52         | 80           | 49         | 47         |
| 50-59                   | 30         | 60           | 40         | 39         | 100          | 76          | 75         | 80           | 55           | 55         | 60           | 40         | 40         |
| ≥60                     | 36         | 100          | 78         | 78         | 110          | 92          | 90         | 100          | 77           | 76         | 100          | 60         | 58         |
| <b>Total</b>            | <b>872</b> | <b>1,080</b> | <b>927</b> | <b>879</b> | <b>1,170</b> | <b>1048</b> | <b>999</b> | <b>1,150</b> | <b>1,008</b> | <b>972</b> | <b>1,140</b> | <b>989</b> | <b>957</b> |
| <b>Pakoto (urban)</b>   |            |              |            |            |              |             |            |              |              |            |              |            |            |
|                         | 2017**     | 2018         |            |            | 2019         |             |            | 2020         |              |            |              |            |            |
| <1                      | 109        | 110          | 82         | 76         | 100          | 67          | 65         | 60           | 38           | 37         |              |            |            |
| 1-2                     | 141        | 110          | 103        | 100        | 110          | 109         | 105        | 80           | 67           | 67         |              |            |            |
| 3-4                     | 85         | 100          | 70         | 68         | 100          | 76          | 73         | 100          | 83           | 81         |              |            |            |
| 5-9                     | 161        | 130          | 126        | 119        | 125          | 119         | 117        | 120          | 116          | 116        |              |            |            |
| 10-14                   | 75         | 140          | 120        | 117        | 120          | 103         | 102        | 130          | 116          | 115        |              |            |            |
| 15-19                   | 20         | 110          | 95         | 92         | 100          | 76          | 76         | 100          | 78           | 78         |              |            |            |
| 20-39                   | 130        | 100          | 92         | 91         | 110          | 107         | 106        | 110          | 104          | 104        |              |            |            |
| 40-49                   | 57         | 110          | 101        | 100        | 110          | 100         | 99         | 120          | 110          | 110        |              |            |            |
| 50-59                   | 66         | 110          | 99         | 98         | 100          | 90          | 90         | 100          | 84           | 84         |              |            |            |
| ≥60                     | 75         | 100          | 80         | 80         | 110          | 99          | 99         | 80           | 59           | 59         |              |            |            |
| <b>Total</b>            | <b>919</b> | <b>1120</b>  | <b>968</b> | <b>941</b> | <b>1085</b>  | <b>946</b>  | <b>932</b> | <b>1000</b>  | <b>855</b>   | <b>851</b> |              |            |            |

\* Age groups (school-aged children and young adolescents) with poor participation due to ‘apprehension’ about the swab procedure were oversampled to improve response. Participants or their caregivers occasionally made errors in reporting ages at the time of invitation. Such participants had to be reclassified to their correct age groups at the time of interview and the wrongfully assigned age group had to be resampled. \*\* Sampling technique was not age-stratified in this year. This was a convenient sample volunteers and results of this survey have been published. (1)

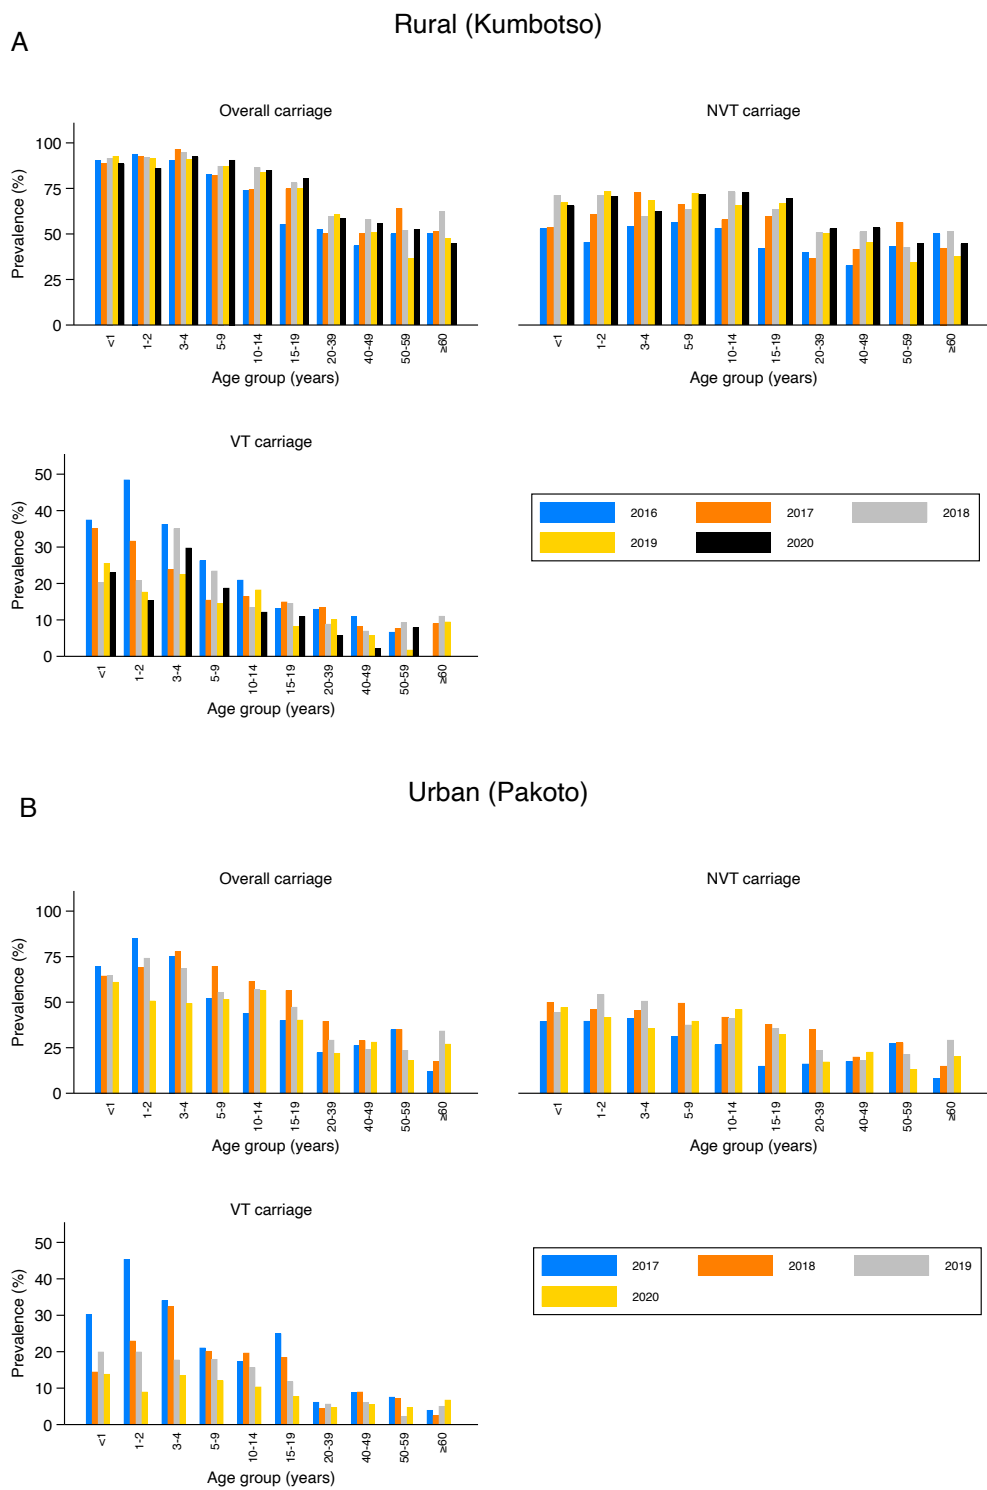

Supplementary Fig. 2: **Age-stratified annual pneumococcal carriage prevalence.** Carriage prevalence of overall, NVT and VT across sampled age groups by survey year in the rural site Note scales for VT carriage are from 0-50%.

Supplement Table 2: Annual crude serotype-specific carriage prevalence and crude odds ratio (OR) and 95% CI from logistic regression comparing carriage in the final survey (Year 5) to the baseline survey (year 1) of VTs and the commonest NVTs among children aged <5 years in Kumbotso, the rural site

| Serotype | Children aged <5 years in Kumbotso (rural) |                |                |                 |                 | Crude OR (95% CI)      | P value*          |
|----------|--------------------------------------------|----------------|----------------|-----------------|-----------------|------------------------|-------------------|
|          | Prevalence (95% CI)                        |                |                |                 |                 |                        |                   |
|          | Year 1                                     | Year 2         | Year 3         | Year 4          | Year 5          |                        |                   |
| 19F      | 16.2 (12.0,21.5)                           | 9.9 (6.4,14.4) | 6.6 (4.0,10.2) | 4.9 (2.9,7.8)   | 5.4 (3.2,8.5)   | <b>0.3 (0.2,0.54)</b>  | <b>&lt;0.0001</b> |
| 23F      | 10.5 (7.1,14.9)                            | 9.9 (6.4,14.4) | 4.9 (2.8,8.1)  | 6.9 (4.4,10.1)  | 3.9 (2.1,6.7)   | <b>0.3 (0.2,0.7)</b>   | <b>0.003</b>      |
| 6B       | 5.1 (2.8,8.4)                              | 3.4 (1.6,6.5)  | 3.3 (1.6,6.1)  | 3.8 (2.1,6.4)   | 3.3 (1.7,5.9)   | 0.7 (0.3,1.5)          | 0.33              |
| 14       | 3.0 (1.4,5.8)                              | 1.9 (0.6,4.4)  | 2.3 (0.9,4.7)  | 1.1 (0.3,2.8)   | 4.5 (2.5,7.4)   | 1.6 (0.7,3.7)          | 0.29              |
| 4        | 2.7 (1.2,5.3)                              | 1.1 (0.2,3.3)  | 0.7 (0.1,2.4)  | 0.8 (0.2,2.4)   | 0.6 (0.1,2.2)   | 0.2 (0.5,1.1)          | 0.06              |
| 9V       | 2.4 (1.0,4.9)                              | 2.7 (1.1,5.5)  | 2.6 (1.1,5.2)  | 0.0 (0.0,0.0)   | 0.9 (0.2,2.6)   | 0.4 (0.1,1.5)          | 0.18              |
| 18C      | 1.7 (0.6,3.9)                              | 1.1 (0.2,3.3)  | 2.0 (0.7,4.3)  | 3.0 (1.5,5.4)   | 2.1 (0.9,4.3)   | 1.3 (0.4,4.2)          | 0.65              |
| 5        | 0.3 (0.01,1.9)                             | 0.0 (0.0,0.0)  | 0.0 (0.0,0.0)  | 0.0 (0.0,0.0)   | 0.0 (0.0,0.0)   | ._**                   | ._**              |
| 1        | 0.0 (0.0,0.0)                              | 0.0 (0.0,0.0)  | 1.0 (0.2,2.9)  | 0.6 (0.1,2.0)   | 0.0 (0.0,0.0)   | ._**                   | ._**              |
| 7F       | 0.0 (0.0,0.0)                              | 0.0 (0.0,0.0)  | 1.6 (0.5,3.8)  | 0.0 (0.0,0.0)   | 0.9 (0.2,2.3)   | ._**                   | ._**              |
| 6A       | 14.2 (10.2,19.2)                           | 9.5 (6.1,14.0) | 8.6 (5.6,12.5) | 10.7 (7.6,14.6) | 11.1 (7.8,15.3) | 0.8 (0.5,1.3)          | 0.34              |
| 19A      | 2.7 (1.2,5.3)                              | 6.4 (3.8,10.3) | 7.6 (4.8,11.4) | 6.9 (4.4,10.1)  | 5.4 (3.2,8.5)   | 2.2 (0.9,5.1)          | 0.08              |
| 3        | 2.0 (0.7,4.4)                              | 2.3 (0.8,5.0)  | 3.0 (1.5,5.6)  | 1.9 (0.8,4.0)   | 1.2 (0.3,3.1)   | 0.6 (0.2,2.2)          | 0.45              |
| 16F      | 0.3 (0.01,1.9)                             | 6.1 (3.5,9.8)  | 3.3 (1.6,6.1)  | 5.8 (3.6,8.8)   | 3.9 (2.1,6.7)   | <b>12.6 (1.6,97.3)</b> | <b>0.015</b>      |
| 10A      | 0.3 (0.01,1.9)                             | 1.1 (0.2,3.3)  | 3.6 (1.8,6.5)  | 1.1 (0.3,2.8)   | 3.6 (1.9,6.3)   | <b>11.6 (1.5,90.0)</b> | <b>0.02</b>       |
| 15A      | 0.3 (0.01,1.9)                             | 1.1 (0.2,3.3)  | 3.0 (1.4,5.6)  | 3.0 (1.5,5.4)   | 1.8 (0.7,3.9)   | 5.7 (0.7,47.6)         | 0.11              |
| 15B      | 1.4 (0.4,3.5)                              | 1.5 (0.4,3.9)  | 2.3 (0.9,4.7)  | 3.0 (1.0,5.4)   | 1.5 (0.5,3.5)   | 1.2 (0.3,4.4)          | 0.82              |
| 13       | 0.7 (0.1,2.4)                              | 3.0 (1.3,6.0)  | 2.6 (1.1,5.2)  | 1.4 (0.4,3.2)   | 3.0 (1.4,5.5)   | <b>4.8 (1.0,22.1)</b>  | <b>0.05</b>       |
| 11A      | 3.4 (1.6,6.2)                              | 4.2 (2.1,7.5)  | 4.0 (2.0,6.9)  | 5.8 (3.6,8.8)   | 4.5 (2.5,7.4)   | 1.4 (0.6,3.2)          | 0.4               |
| 21       | 2.0 (0.7,4.4)                              | 2.7 (1.1,5.5)  | 2.6 (1.1,5.2)  | 2.5 (1.1,4.7)   | 3.0 (1.4,5.5)   | 1.6 (0.6,4.4)          | 0.39              |
| 34       | 2.0 (0.7,4.4)                              | 3.8 (1.8,7.0)  | 6.3 (3.8,9.8)  | 1.9 (0.8,4.0)   | 2.7 (1.2,5.1)   | 1.4 (0.5,4.0)          | 0.52              |
| 20       | 1.4 (0.4,3.5)                              | 3.8 (1.8,7.0)  | 0.7 (0.1,2.4)  | 1.6 (0.6,3.6)   | 1.2 (0.3,3.1)   | 0.9 (0.2,3.8)          | 0.92              |
| 8        | 0.7 (0.1,2.4)                              | 1.5 (0.4,3.9)  | 4.0 (2.0,6.9)  | 0.8 (0.2,2.4)   | 0.0 (0.0,0.0)   |                        |                   |

|     |               |                |                 |                |               |               |      |
|-----|---------------|----------------|-----------------|----------------|---------------|---------------|------|
| 33F | 0.7 (0.1,2.4) | 1.1 (0.2,3.3)  | 0.7 (0.08,2.38) | 0.6 (0.1,2.0)  | 0.6 (0.1,2.2) | 0.9 (0.1,6.7) | 0.94 |
| 22F | 0.7 (0.1,2.4) | 0.4 (0.01,2.1) | 1.0 (0.2,2.9)   | 0.3 (0.01,1.5) | 0.6 (0.1,2.2) | 0.9 (0.1,6.7) | 0.94 |

\* P values are for crude differences in the serotype-specific carriage prevalence in the final survey (Year 5 - 2020) compared to the baseline survey (Year 1 - 2016) using Chi square test. P values for bolded ORs are <0.05 and are two-sided. \*\*ORs could not be calculated because carriage was not observed for these serotypes in either Year 1 or Year 5 or both.

Supplement Table 3: Annual serotype-specific carriage prevalence and crude odds ratio (OR) and 95% CI from logistic regression comparing carriage in the final survey (Year 4) to the baseline survey (year 1) of VTs and the commonest NVTs among children aged <5 years in Pakoto, the urban site

| Children aged <5 years in Pakoto (urban) |                     |                 |                 |                |                          |              |
|------------------------------------------|---------------------|-----------------|-----------------|----------------|--------------------------|--------------|
| Serotype                                 | Prevalence (95% CI) |                 |                 |                | Crude OR (95% CI)        | P value*     |
|                                          | Year 1              | Year 2          | Year 3          | Year 4         |                          |              |
| 19F                                      | 13.7 (10.1,18.3)    | 4.5 (2.3,8.1)   | 7.0 (4.1,11.2)  | 3.8 (1.5,7.8)  | <b>0.37 (0.16,0.84)</b>  | <b>0.018</b> |
| 6B                                       | 10.5 (7.3,14.5)     | 7.8 (4.7,12.2)  | 6.6 (3.8,10.7)  | 3.8 (1.5,7.8)  | 0.51 (0.22,1.18)         | 0.12         |
| 23F                                      | 7.5 (4.8,11.0)      | 4.1 (2.0,7.5)   | 2.1 (0.7,4.8)   | 1.1 (0.1,3.9)  | <b>0.20 (0.05,0.86)</b>  | <b>0.03</b>  |
| 14                                       | 3.6 (1.9,6.3)       | 0.8 (0.1,3.0)   | 0.8 (0.1,3.0)   | 1.6 (0.3,4.7)  | 0.67 (0.18,2.42)         | 0.54         |
| 9V                                       | 1.5 (0.5,3.5)       | 1.6 (0.5,4.2)   | 0.4 (0.01,2.29) | 0.5 (0.01,3.0) | 0.54 (0.06,4.66)         | 0.57         |
| 4                                        | 0.9 (0.2,2.62)      | 1.2 (0.3,3.6)   | 0.0 (0.0,0.0)   | 0.5 (0.01,3.0) | 0.90 (0.09,8.79)         | 0.93         |
| 18C                                      | 0.0 (0.0,0.0)       | 2.9 (1.2,5.9)   | 2.5 (0.9,5.4)   | 0.5 (0.01,3.0) | -**                      | -**          |
| 6A                                       | 7.8 (5.1,11.4)      | 11.5 (7.6,16.6) | 7.4 (4.4,11.7)  | 2.7 (0.9,6.3)  | 0.49 (0.18,1.33)         | 0.16         |
| 19A                                      | 5.4 (3.2,8.5)       | 8.6 (5.3,13.2)  | 7.8 (4.7,12.2)  | 7.6 (4.1,12.7) | <b>2.30 (1.09,4.82)</b>  | <b>0.03</b>  |
| 3                                        | 2.4 (1.0,4.7)       | 1.6 (0.5,4.2)   | 1.7 (0.5,4.2)   | 1.1 (0.1,3.9)  | 0.67 (0.14,3.22)         | 0.62         |
| 15B                                      | 3.0 (1.4,5.5)       | 4.1 (2.0,7.5)   | 4.5 (2.3,8.1)   | 4.9 (2.2,9.2)  | <b>2.59 (1.02,6.58)</b>  | <b>0.05</b>  |
| 16F                                      | 1.2 (0.3,3.1)       | 2.5 (0.9,5.4)   | 4.1 (2.0,7.6)   | 3.8 (1.5,7.8)  | <b>5.03 (1.44,17.62)</b> | <b>0.01</b>  |
| 11A                                      | 2.7 (1.2,5.1)       | 2.5 (0.90,5.35) | 5.8 (3.2,9.7)   | 3.2 (1.2,7.1)  | 1.86 (0.64,5.37)         | 0.25         |
| 15A                                      | 0.0 (0.0,0.0)       | 0.8 (0.1,3.0)   | 0.4 (0.01,3.0)  | 3.2 (1.2,7.1)  | -**                      | -**          |
| 23B                                      | 1.2 (0.3,3.1)       | 0.0 (0.0,0.0)   | 0.4 (0.01,3.0)  | 2.2 (0.6,5.5)  | 2.78 (0.68,11.37)        | 0.15         |
| 38                                       | 0.9 (0.2,2.6)       | 0.4 (0.01,3.0)  | 0.0 (0.0,0.0)   | 2.2 (0.6,5.5)  | 3.72 (0.82,16.98)        | 0.09         |
| 10A                                      | 0.6 (0.1,2.2)       | 1.6 (0.5,4.2)   | 1.2 (0.3,3.6)   | 1.1 (0.1,3.9)  | 2.74 (0.38,19.79)        | 0.32         |
| 37                                       | 0.3 (0.01,1.7)      | 0.8 (0.10,3.0)  | 0.0 (0.0,0.0)   | 1.1 (0.1,3.1)  | 5.51 (0.49,61.62)        | 0.17         |
| 35B                                      | 2.4 (1.03,4.7)      | 0.4 (0.01,3.0)  | 0.4 (0.01,3.0)  | 0.5 (0.01,3.0) | 0.33 (0.04,2.69)         | 0.30         |
| 20                                       | 0.6 (0.1,2.2)       | 0.4 (0.01,3.0)  | 1.2 (0.3,3.6)   | 0.5 (0.01,3.0) | 1.36 (0.12,15.17)        | 0.80         |
| 12F                                      | 0.3 (0.01,1.7)      | 0.4 (0.01,3.0)  | 0.8 (0.1,3.0)   | 0.5 (0.01,3.0) | 2.73 (0.17,44.11)        | 0.48         |
| 22F                                      | 0.0 (0.0,0.0)       | 0.0 (0.0,0.0)   | 0.0 (0.0,0.0)   | 0.5 (0.01,3.0) | -**                      | -**          |

|     |                |                |                |                |                   |      |
|-----|----------------|----------------|----------------|----------------|-------------------|------|
| 15C | 0.3 (0.01,1.7) | 3.3 (1.4,6.5)  | 3.7 (1.7,7.0)  | 0.5 (0.01,3.0) | 2.73 (0.17,44.11) | 0.48 |
| 13  | 0.3 (0.01,1.7) | 0.8 (0.1,3.0)  | 0.4 (0.01,3.0) | 0.0 (0.0,0.0)  | -**               | -**  |
| 21  | 1.2 (0.3,3.1)  | 0.4 (0.01,2.3) | 1.7 (0.5,4.2)  | 0.0 (0.0,0.0)  | -**               | -*8  |

\* P values are for crude differences in the serotype-specific carriage prevalence in the final survey (Year 5 - 2020) compared to the baseline survey (Year 1 - 2017) using Chi square test. P values for bolded ORs are <0.05 and are two-sided. \*\*ORs could not be calculated because carriage was not observed for these serotypes in either Year 1 or Year 4 or both.



Supplement Table 4: Annual crude serotype-specific carriage prevalence and crude odds ratio (OR) and 95% CI from logistic regression comparing carriage in the final survey (Year 5) to the baseline survey (year 1) of VTs and the commonest NVTs among persons aged  $\geq 5$  years in Kumbotso, the rural site

| Persons aged $\geq 5$ years in Kumbotso (rural) |                     |                |               |                |                |                       |              |
|-------------------------------------------------|---------------------|----------------|---------------|----------------|----------------|-----------------------|--------------|
| Serotype                                        | Prevalence (95% CI) |                |               |                |                | Crude OR (95% CI)     | P value*     |
|                                                 | Year 1              | Year 2         | Year 3        | Year 4         | Year 5         |                       |              |
| 19F                                             | 5.0 (3.3,7.2)       | 3.3 (2.0,5.0)  | 1.2 (0.5,2.3) | 2.3 (1.3,3.8)  | 1.6 (0.8,3.0)  | <b>0.3 (0.1,0.6)</b>  | <b>0.001</b> |
| 23F                                             | 3.4 (2.1,5.3)       | 2.4 (1.4,4.0)  | 2.9 (1.8,4.4) | 2.5 (1.4,4.1)  | 1.6 (0.8,3.0)  | <b>0.4 (0.2,0.9)</b>  | <b>0.025</b> |
| 9V                                              | 2.2 (1.2,3.8)       | 1.5 (0.7,2.8)  | 0.7 (0.2,1.7) | 0.8 (0.3,1.9)  | 0.2 (0,0.9)    | <b>0.1 (0.01,0.5)</b> | <b>0.008</b> |
| 4                                               | 1.6 (0.7,2.9)       | 2.8 (1.6,4.4)  | 1.3 (0.6,2.5) | 0.3 (0.04,1.2) | 1.5 (0.7,2.8)  | 0.9 (0.3,2.2)         | 0.74         |
| 6B                                              | 1.6 (0.7,2.9)       | 1.6 (0.8,3.0)  | 1.3 (0.6,2.5) | 1.0 (0.4,2.1)  | 1.3 (0.6,2.5)  | 0.8 (0.3,2.0)         | 0.57         |
| 18C                                             | 1.4 (0.6,2.7)       | 1.3 (0.6,2.6)  | 2.6 (1.5,4.1) | 1.3 (0.6,2.6)  | 2.3 (1.2,3.8)  | 1.5 (0.6,3.6)         | 0.36         |
| 14                                              | 1.0 (0.4,2.2)       | 0.3 (0.04,1.2) | 0.4 (0.1,1.3) | 0.7 (0.2,1.7)  | 0.8 (0.3,1.9)  | 0.7 (0.2,2.3)         | 0.57         |
| 7F                                              | 0.5 (0.1,1.5)       | 0.0 (0.0,0.0)  | 0.9 (0.3,1.9) | 0.8 (0.3,1.9)  | 0.5 (0.1,1.4)  | 0.9 (0.2,4.3)         | 0.85         |
| 1                                               | 0.3 (0.04,1.2)      | 0.0 (0.0,0.0)  | 1.2 (0.5,2.3) | 1.2 (0.5,2.4)  | 0.0 (0.0,0.0)  | **                    | **           |
| 5                                               | 0.0 (0.0,0.0)       | 0.0 (0.0,0.0)  | 0.3 (0.3,1.0) | 0.0 (0.0,0.0)  | 0.0 (0.0,0.0)  | **                    | **           |
| 3                                               | 4.3 (2.8,6.3)       | 5.0 (3.4,7.2)  | 3.6 (2.3,5.3) | 3.1 (1.9,4.9)  | 6.4 (4.6,8.9)  | 1.4 (0.8,2.4)         | 0.20         |
| 6A                                              | 4.1 (2.6,6.1)       | 2.3 (1.2,3.8)  | 2.7 (1.7,4.3) | 3.0 (1.8,4.7)  | 1.8 (0.88,3.2) | 0.8 (0.3,2.0)         | 0.57         |
| 19A                                             | 0.5 (0.1,1.5)       | 1.3 (0.6,2.6)  | 2.2 (1.2,3.6) | 1.9 (0.9,3.2)  | 2.4 (1.4,4.0)  | <b>4.4 (1.3,15.3)</b> | <b>0.02</b>  |
| 34                                              | 2.9 (1.7,4.7)       | 3.3 (2.0,5.0)  | 3.2 (2.0,4.8) | 2.6 (1.5,4.3)  | 3.9 (2.5,5.8)  | 1.2 (0.6,2.3)         | 0.54         |
| 11A                                             | 2.8 (1.6,4.5)       | 2.8 (1.6,4.4)  | 2.9 (1.8,4.4) | 2.3 (1.3,3.8)  | 3.7 (2.4,5.6)  | 1.2 (0.7,2.4)         | 0.52         |
| 16F                                             | 1.2 (0.5,2.5)       | 2.4 (1.4,4.0)  | 3.3 (2.1,5.0) | 3.1 (1.9,4.9)  | 3.7 (2.4,5.6)  | <b>2.9 (1.2,6.9)</b>  | <b>0.015</b> |
| 10A                                             | 1.4 (0.6,2.7)       | 1.3 (0.6,2.6)  | 2.6 (1.5,4.1) | 2.3 (1.3,3.8)  | 3.5 (2.2,5.4)  | <b>2.4 (1.1,5.5)</b>  | <b>0.035</b> |
| 37                                              | 0.5 (0.1,1.5)       | 1.3 (0.6,2.6)  | 1.6 (0.8,2.8) | 2.6 (1.5,4.3)  | 2.7 (1.6,4.4)  | <b>5.0 (1.5,17.2)</b> | <b>0.011</b> |
| 8                                               | 1.4 (0.6,2.7)       | 2.8 (1.6,4.4)  | 4.8 (3.3,6.7) | 3.0 (1.8,4.7)  | 1.8 (0.9,3.2)  | 1.2 (0.5,3.0)         | 0.73         |
| 21                                              | 2.2 (1.2,3.8)       | 1.3 (0.6,2.6)  | 2.5 (1.4,3.9) | 1.6 (0.8,3.01) | 1.5 (0.7,2.8)  | 0.6 (0.3,1.4)         | 0.22         |
| 13                                              | 1.4 (0.6,2.7)       | 2.8 (1.6,4.4)  | 1.9 (1.0,3.2) | 2.5 (1.4,4.1)  | 1.3 (0.6,2.5)  | 0.9 (0.3,2.3)         | 0.75         |
| 35B                                             | 2.1 (1.1,3.6)       | 0.0 (0.0,0.0)  | 0.1 (0.0,0.8) | 0.8 (0.3,1.9)  | 0.8 (0.3,1.9)  | <b>0.4 (0.1,1.0)</b>  | <b>0.05</b>  |
| 15B                                             | 1.2 (0.5,2.5)       | 0.7 (0.2,1.7)  | 0.7 (0.2,1.7) | 0.7 (0.2,1.7)  | 0.6 (0.2,1.7)  | 0.5 (0.1,1.7)         | 0.25         |

|     |               |               |               |               |               |                |      |
|-----|---------------|---------------|---------------|---------------|---------------|----------------|------|
| 22F | 0.9 (0.9,2.0) | 1.0 (0.4,2.1) | 0.9 (0.3,1.9) | 0.5 (0.1,1.4) | 0.5 (0.1,1.4) | 0.5 (0.1,2.2)  | 0.36 |
| 33F | 0.5 (0.1,1.5) | 1.6 (0.8,3.0) | 1.2 (0.5,2.3) | 0.5 (0.1,1.4) | 0.2 (0.0,0.9) | 0.3 (0.03,2.7) | 0.28 |

\* P values are for crude differences in the serotype-specific carriage prevalence in the final survey (Year 5 - 2020) compared to the baseline survey (Year 1 - 2016) using Chi square test. P values for bolded ORs are <0.05 and are two-sided. \*\*ORs could not be calculated because carriage was not observed for these serotypes in either Year 1 or Year 5 or both.

Supplement Table 5: Annual serotype-specific carriage prevalence and crude odds ratio (OR) and 95% CI from logistic regression comparing carriage in the final survey (Year 4) to the baseline survey (year 1) of VTs and the commonest NVTs among persons aged  $\geq 5$  years in Pakoto, the

| Persons aged $\geq 5$ years in Pakoto (urban) |                     |                |                 |                 |                   |          |
|-----------------------------------------------|---------------------|----------------|-----------------|-----------------|-------------------|----------|
| Serotype                                      | Prevalence (95% CI) |                |                 |                 | Crude OR (95% CI) | P value* |
|                                               | Year 1              | Year 2         | Year 3          | Year 4          |                   |          |
| 23F                                           | 3.2 (1.9,5.0)       | 0.9 (0.3,1.9)  | 1.6 (0.80,2.86) | 1.2 (0.52,2.37) | 0.33 (0.14,0.78)  | 0.01     |
| 19F                                           | 2.7 (1.6,4.4)       | 3.0 (1.9,4.6)  | 2.6 (1.55,4.13) | 0.9 (0.33,1.96) | 0.30 (0.11,0.78)  | 0.01     |
| 6B                                            | 2.4 (1.3,4.0)       | 1.9 (1.0,3.2)  | 2.2 (1.22,3.59) | 0.8 (0.24,1.75) | 0.29 (0.10,0.81)  | 0.02     |
| 14                                            | 1.4 (0.6,2.7)       | 0.6 (0.2,1.5)  | 0.6 (0.16,1.49) | 0.2 (0,0.84)    | 0.10 (0.01,0.82)  | 0.03     |
| 18C                                           | 1.2 (0.5,2.5)       | 3.2 (2.0,4.8)  | 1.5 (0.70,2.67) | 1.1 (0.42,2.17) | 0.84 (0.29,2.43)  | 0.74     |
| 9V                                            | 0.7 (0.2,1.7)       | 1.1 (0.5,2.3)  | 0.2 (0,0.81)    | 0.2 (0,0.84)    | 0.21 (0.02,1.87)  | 0.16     |
| 4                                             | 0.7 (0.2,1.7)       | 1.1 (0.5,2.3)  | 0.7 (0.24,1.69) | 2.0 (1.04,3.34) | 2.84 (0.91,8.84)  | 0.07     |
| 7F                                            | 0.3 (0.04,1.2)      | 0.3 (0.03,1.0) | 0.2 (0,0.81)    | 1.4 (0.62,2.57) | 3.90 (0.83,18.27) | 0.08     |
| 5                                             | 0.0 (0.0,0.0)       | 0.1 (0.0,0.8)  | 0.0 (0.0,0.0)   | 0.2 (0,0.84)    | -**               | -**      |
| 1                                             | 0.0 (0.0,0.0)       | 0.1 (0.0,0.8)  | 0.0 (0.0,0.0)   | 0.0 (0.0,0.0)   | -**               | -**      |
| 6A                                            | 2.7 (1.6,4.4)       | 2.3 (1.3,3.7)  | 2.2 (1.2,3.6)   | 1.2 (0.5,2.4)   | 3.90 (0.83,18.27) | 0.08     |
| 3                                             | 1.9 (0.9,3.3)       | 3.7 (2.4,5.5)  | 1.7 (0.9,3.0)   | 2.3 (1.3,3.7)   | 1.16 (0.52,2.58)  | 0.72     |
| 19A                                           | 1.5 (0.7,2.9)       | 1.6 (0.8,2.8)  | 2.3 (1.3,3.8)   | 2.1 (1.2,3.5)   | 1.33 (0.56,3.14)  | 0.52     |
| 11A                                           | 2.2 (1.2,3.8)       | 3.0 (1.9,4.6)  | 3.2 (2.0,4.8)   | 2.6 (1.5,4.1)   | 1.11 (0.53,2.34)  | 0.79     |
| 16F                                           | 1.2 (0.5,2.5)       | 3.2 (2.0,4.8)  | 2.9 (1.8,4.5)   | 1.1 (0.4,2.2)   | 0.84 (0.29,2.43)  | 0.74     |
| 23B                                           | 0.9 (0.3,2.0)       | 0.3 (0.03,1.0) | 0.3 (0.04,1.1)  | 1.7 (0.8,3.0)   | 1.89 (0.65,5.55)  | 0.24     |
| 34                                            | 0.3 (0.04,1.2)      | 1.3 (0.6,2.4)  | 1.6 (0.8,2.9)   | 1.1 (0.4,2.2)   | 3.01 (0.62,14.65) | 0.17     |
| 21                                            | 0.2 (0.01,1.0)      | 1.1 (0.5,2.3)  | 0.7 (0.2,1.7)   | 1.1 (0.4,2.2)   | 6.04 (0.74,49.58) | 0.09     |
| 15B                                           | 0.7 (0.2,1.7)       | 2.4 (1.4,3.9)  | 1.0 (0.4,2.1)   | 0.9 (0.3,2.0)   | 1.27 (0.35,4.57)  | 0.71     |
| 12F                                           | 0.3 (0.04,1.2)      | 0.0 (0.0,0.0)  | 0.0 (0.0,0.0)   | 0.9 (0.3,2.0)   | 2.57 (0.51,12.88) | 0.25     |
| 8                                             | 0.2 (0.01,1.0)      | 1.1 (0.5,2.3)  | 1.2 (0.5,2.3)   | 0.9 (0.3,2.0)   | 5.16 (0.62,43.24) | 0.13     |
| 15C                                           | 0.3 (0.04,1.2)      | 1.1 (0.5,2.3)  | 0.3 (0.04,1.1)  | 0.9 (0.3,2.0)   | 2.57 (0.51,12.86) | 0.25     |
| 10A                                           | 0.3 (0.04,1.2)      | 0.6 (0.2,1.5)  | 1.5 (0.7,2.7)   | 0.6 (0.2,1.5)   | 1.70 (0.31,9.36)  | 0.54     |

|     |                |                |                |                |                   |      |
|-----|----------------|----------------|----------------|----------------|-------------------|------|
| 22F | 0.2 (0.01,1.0) | 0.1 (0.01,0.8) | 0.3 (0.04,1.1) | 0.5 (0.1,1.3)  | 2.55 (0.26,24.70) | 0.42 |
| 13  | 0.7 (0.2,1.7)  | 2.2 (1.2,3.5)  | 0.9 (0.3,1.9)  | 0.3 (0.04,1.1) | 0.42 (0.08,2.30)  | 0.32 |

---

\* P values are for crude differences in the serotype-specific carriage prevalence in the final survey (Year 5 - 2020) compared to the baseline survey (Year 1 - 2017) using Chi square test. P values for bolded ORs are <0.05 and are two-sided. \*\*ORs could not be calculated because carriage was not observed for these serotypes in either Year 1 or Year 4 or both.

Supplement Table 6: Annual coverage of PCV10 among children aged <5 years.

| PCV10 coverage                |        |              |          |              |         |              |
|-------------------------------|--------|--------------|----------|--------------|---------|--------------|
| Dose                          | 1 Dose | 95% (CI)     | 2 Doses* | 95% (CI)     | 3 Doses | 95% (CI)     |
| Kumbotso (rural)              |        |              |          |              |         |              |
| Time since PCV10 introduction |        |              |          |              |         |              |
| Year 1                        | 8.04   | 6.89, 9.32   | 7.39     | 6.29, 8.63   | 6.56    | 5.52, 7.73   |
| Year 2                        | 34.3   | 28.10, 41.00 | 31.90    | 25.90, 38.5  | 27.90   | 22.30, 34.20 |
| Year 3                        | 47.37  | 43.5, 51.27  | 41.62    | 37.87, 45.46 | 34.64   | 31.10, 38.36 |
| Year 4                        | 70.38  | 66.79, 73.74 | 62.44    | 58.72, 66.03 | 54.20   | 50.45, 57.90 |
| Year 5                        | 90.33  | 87.88, 92.33 | 84.13    | 81.19, 86.68 | 76.33   | 73.02, 79.36 |
| Pakoto (urban)                |        |              |          |              |         |              |
| Time since PCV10 introduction |        |              |          |              |         |              |
| Year 1                        | 15.54  | 13.48, 17.82 | 15.00    | 12.98, 17.25 | 14.78   | 12.77, 17.01 |
| Year 2                        | 45.2   | 35.40, 54.80 | 48.00    | 39.30, 65.2  | 55.40   | 47.30, 63.20 |
| Year 3                        | 65.95  | 61.76, 69.91 | 61.35    | 57.10, 65.43 | 57.36   | 53.16, 61.46 |
| Year 4                        | 96.67  | 94.99, 97.8  | 94.40    | 92.3, 95.96  | 92.28   | 89.93, 94.13 |

Coverage for Year 1 and Year 2 were estimated using a birth cohort analysis of children observed between Year3 and Year 5 in Kumbotso, and Year 3 and Year 4 in Pakoto.

\* PCV10 coverage used in the analysis of relationship between VT carriage and PCV10 uptake in Figure 3 of the main text.

Supplement Table 7: Carriage prevalence (95% CI) of serotypes contained in different PCV formulations in the baseline and final surveys among children aged <5 years and persons aged ≥5 years in the rural and urban sites

| Formulation            | Age group | Kumbotso (rural) |                  | Pakoto (urban)   |                  |
|------------------------|-----------|------------------|------------------|------------------|------------------|
|                        |           | 2016             | 2020             | 2017             | 2020             |
| PCV10 GSK <sup>1</sup> | <5 years  | 42.0 (36.5,47.8) | 22.0 (17.8,26.8) | 37.6 (32.6,42.9) | 12.0 (8.0,17.5)  |
|                        | ≥5 years  | 17.0 (14.2,20.3) | 9.9 (7.8,12.5)   | 12.6 (10.1,15.5) | 7.7 (5.9,9.9)    |
| PCV10 SII <sup>2</sup> | <5 years  | 54.4 (48.7,60.0) | 35.4 (30.5,40.7) | 21.1 (15.8,27.6) | 53.1 (47.8,58.4) |
|                        | ≥5 years  | 18.7 (15.8,22.1) | 10.1 (8.0,12.8)  | 7.9 (6.1,10.3)   | 18.7 (15.7,22.0) |
| PCV13 <sup>3</sup>     | <5 years  | 60.8 (55.1,66.2) | 39.3 (34.2,44.7) | 53.1 (47.8,58.4) | 23.2 (17.7,29.9) |
|                        | ≥5 years  | 25.9 (22.5,29.7) | 20.3 (17.3,23.6) | 18.7 (15.7,22.0) | 13.2 (10.8,16.0) |
| PCV15 <sup>4</sup>     | <5 years  | 62.2 (56.5,67.5) | 40.5 (35.4,45.9) | 53.1 (47.8,58.4) | 23.8 (18.2,30.4) |
|                        | ≥5 years  | 27.3 (23.8,31.1) | 20.9 (17.9,24.3) | 18.8 (15.9,22.2) | 13.7 (11.3,16.5) |
| PCV20 <sup>5</sup>     | <5 years  | 67.9 (62.4,73.0) | 51.7 (46.3,57.0) | 59.7 (54.4,64.8) | 34.1 (27.6,41.2) |
|                        | ≥5 years  | 34.0 (30.3,38.0) | 31.1 (27.6,34.8) | 22.6 (19.4,26.1) | 19.5 (16.7,22.7) |

<sup>1</sup>GSK 10-valent PCV; <sup>2</sup>Serum Institute of India 10-valent PCV; <sup>3</sup>Pfizer 13-valent PCV; <sup>4</sup>Merck 15-valent PCV; <sup>5</sup>Pfizer 20-valent PCV

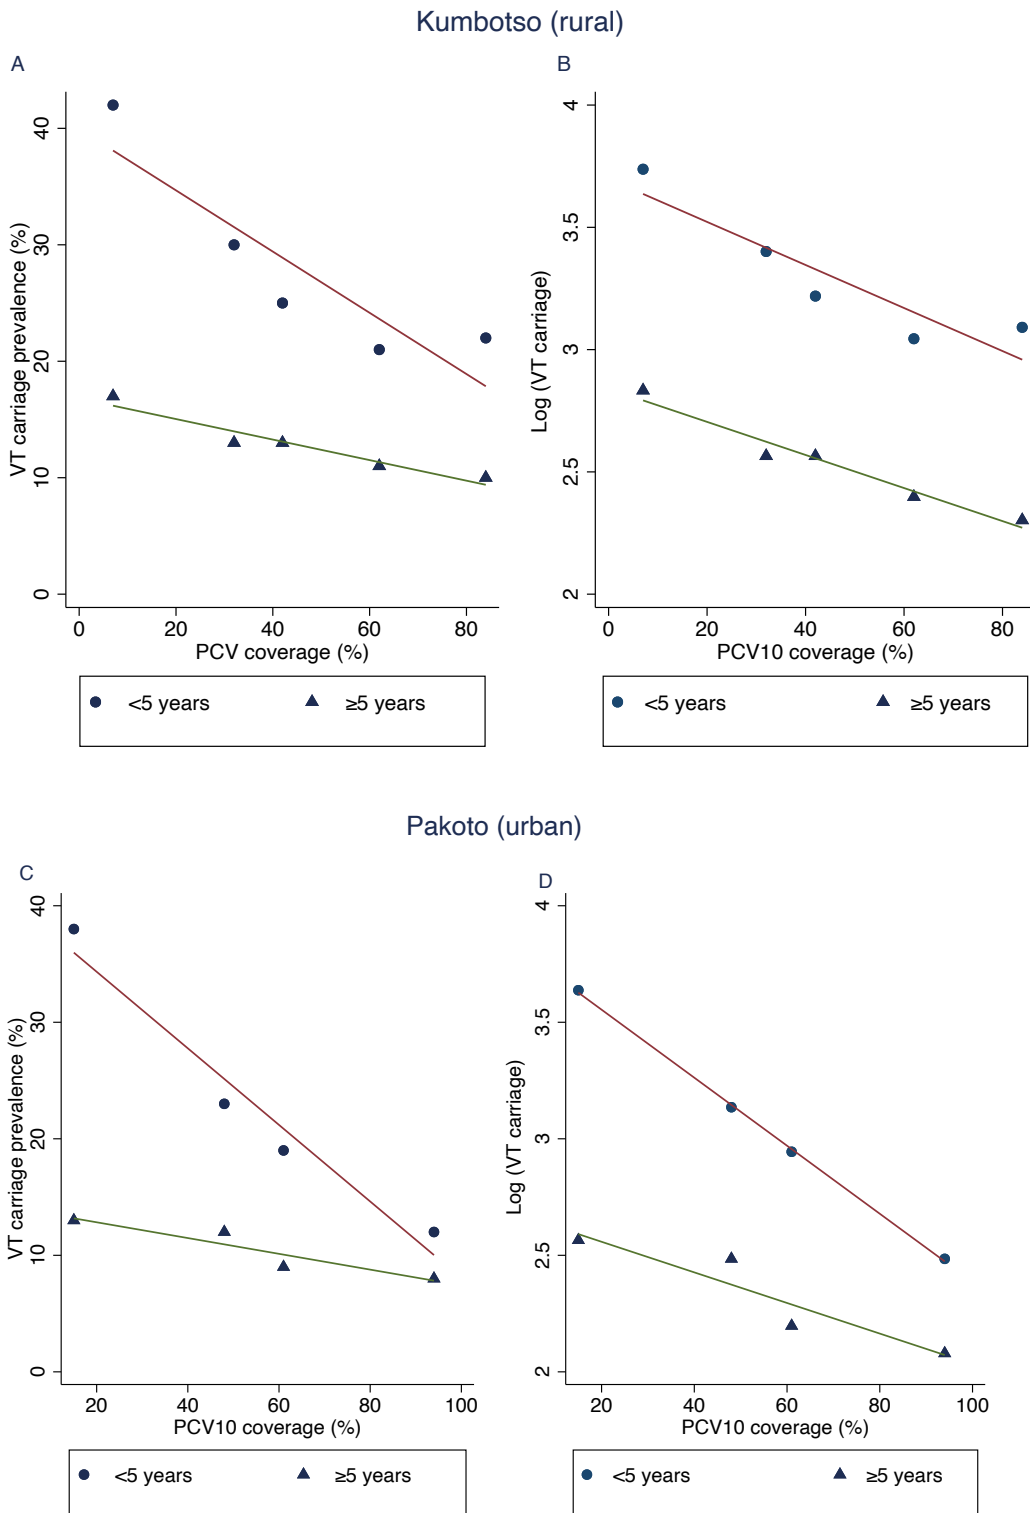

Supplementary Fig. 3: **Relationship between VT carriage and PCV10 coverage.** Graph comparing model fit of linear and non-linear (log-linear) relationship between changes in VT carriage and coverage with 2 doses of PCV10 in Kumbotso (A-B, top) and Pakoto (C-D, bottom).

Using the Akaike Information Criterion (AIC), the non-linear model had a better fit for children aged <5 years compared to the linear model. AIC values for the linear and log-linear models in children aged <5 years are -3.14

and -14.00 in Kumbotso and -3.98 and -17.68 in Kumbotso. The respective AIC values for persons aged  $\geq 5$  years are -32.10 and -35.67 in Kumbotso and -23.69 and 12.61 in Pakoto.

In Figure S3 (left), the gradient (95% CI) and R<sup>2</sup> for each line of the linear regression are: Kumbotso age <5 years -0.26 (-0.50- -0.03), 0.73; Kumbotso age  $\geq 5$  years -0.09 (-0.13- -0.04), 0.93; Pakoto age <5 years -0.33 (-0.54- -0.11), 0.80; Pakoto age  $\geq 5$  years -0.07 (-0.10- -0.04), 0.97.

In Figure S3 (right), the gradient (95% CI) and R<sup>2</sup> for each line of the log-linear regression (on the log scale) are: Kumbotso age <5 years -0.0088 (-0.016- -0.0017), 0.83; Kumbotso age  $\geq 5$  years -0.0068 (-0.0093- -0.0042), 0.94; Pakoto age <5 years -0.0146 (-0.0157- -0.013), 0.99; Pakoto age  $\geq 5$  years -0.066(-0.014- -0.013), 0.86.



Supplement Table 8: Serotypes included in the different PCV formulations

| Formulation          | Serotypes included |   |   |   |    |    |    |   |    |     |     |     |    |     |     |     |     |     |     |     |   |
|----------------------|--------------------|---|---|---|----|----|----|---|----|-----|-----|-----|----|-----|-----|-----|-----|-----|-----|-----|---|
|                      | 1                  | 3 | 4 | 5 | 6A | 6B | 7F | 8 | 9V | 10A | 11A | 12F | 14 | 15B | 18C | 19A | 19F | 22F | 23F | 33F |   |
| PCV10 <sup>1</sup>   | •                  | • |   | • |    | •  | •  |   | •  |     |     |     | •  |     | •   |     | •   |     | •   |     |   |
| SII-PCV <sup>2</sup> | •                  | • |   |   | •  | •  | •  |   | •  |     |     |     | •  |     |     | •   | •   |     |     | •   |   |
| PCV13 <sup>3</sup>   | •                  | • | • | • | •  | •  | •  |   | •  |     |     |     | •  |     | •   | •   | •   |     |     | •   |   |
| PCV15 <sup>4</sup>   | •                  | • | • | • | •  | •  | •  |   | •  |     |     |     | •  |     | •   | •   | •   | •   | •   | •   | • |
| PCV20 <sup>5</sup>   | •                  | • | • | • | •  | •  | •  | • | •  | •   | •   | •   | •  | •   | •   | •   | •   | •   | •   | •   | • |

<sup>1</sup>GSK 10-valent PCV; <sup>2</sup>Serum Institute of India 10-valent PCV; <sup>3</sup>Pfizer 13-valent PCV; <sup>4</sup>Merck 15-valent PCV; <sup>5</sup>Pfizer 20-valent PCV  
Dotted cells represent serotypes included in each vaccine

Supplement Table 9: Annual diversity of serotypes by site, age and year of survey

| Age       | Year of survey | Kumbotso (rural)          |                             | Pakoto (urban)            |                             |
|-----------|----------------|---------------------------|-----------------------------|---------------------------|-----------------------------|
|           |                | Simpson's diversity index | No. of serotypes identified | Simpson's diversity index | No. of serotypes identified |
| < 5 years | 2016           | 0.976                     | 41                          |                           |                             |
|           | 2017           | 0.974                     | 39                          | 0.875                     | 32                          |
|           | 2018           | 0.978                     | 46                          | 0.831                     | 30                          |
|           | 2019           | 0.979                     | 49                          | 0.839                     | 29                          |
|           | 2020           | 0.979                     | 49                          | 0.751                     | 27                          |
| ≥5 years  | 2016           | 0.982                     | 55                          |                           |                             |
|           | 2017           | 0.981                     | 54                          | 0.817                     | 45                          |
|           | 2018           | 0.984                     | 62                          | 0.889                     | 41                          |
|           | 2019           | 0.985                     | 65                          | 0.842                     | 46                          |
|           | 2020           | 0.984                     | 61                          | 0.883                     | 46                          |

Strain (serotype) diversity was greater in Kumbotso (rural) than Pakoto (urban) and was marginally greater in older persons, but the diversity index did not vary substantially over time after introduction of the vaccine.
